# Supplementary figures and images for: Multi-omics analysis of genomics, epigenomics and transcriptomics for molecular subtypes and core genes for lung adenocarcinoma
Source: PubMed Central journal article supplement (PMC7942004; doi:10.1186/s12885-021-07888-4), 2021-03-09

Figure 12A

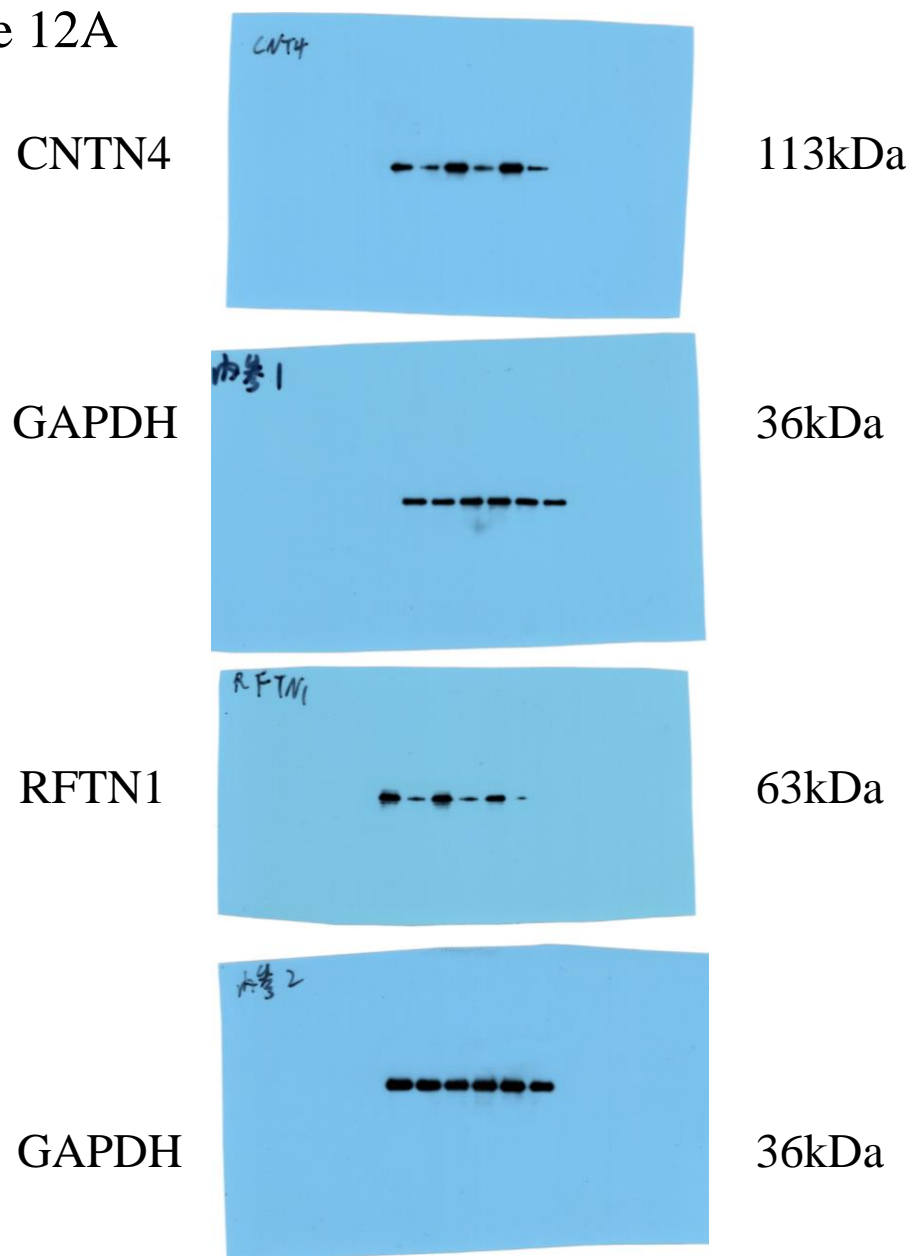

Figure 12D

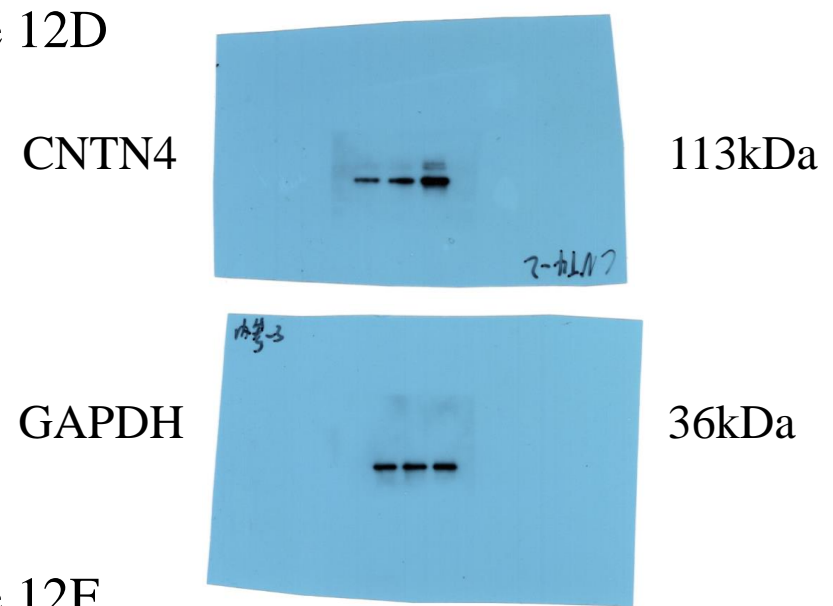

Figure 12F

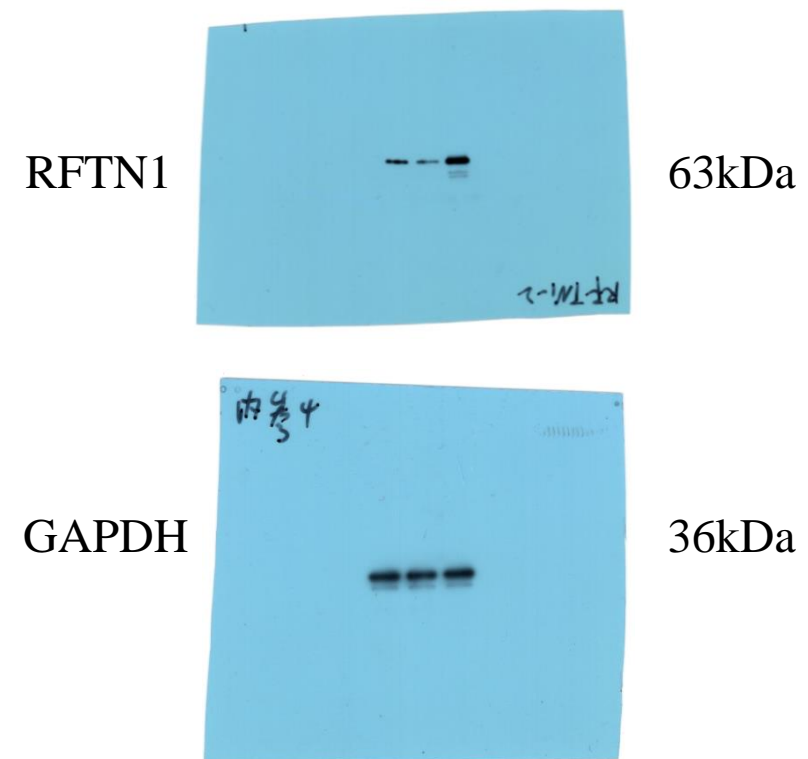

Supplement: 12885_2021_7888_MOESM3_ESM.pdf [file 12885_2021_7888_MOESM3_ESM.pdf]
